# Supplementary material
Source: PubMed Central journal article supplement (PMC3046811)

**TABLE 1 Demographics in the two PACAP Blood study samples**

| <b>Initial PACAP Blood Sample</b>            |                    |                       |                            |                    |
|----------------------------------------------|--------------------|-----------------------|----------------------------|--------------------|
|                                              | <b><u>PTSD</u></b> | <b><u>No PTSD</u></b> | <b><math>\chi^2</math></b> | <b><u>Sig.</u></b> |
| <b><u>Sex</u></b>                            |                    |                       | .82                        | .37                |
| Female                                       | 45.8% (n=11)       | 57.5% (n=23)          |                            |                    |
| Male                                         | 54.2% (n=13)       | 42.5% (n=17)          |                            |                    |
| <b><u>Race/Ethnicity</u></b>                 |                    |                       |                            |                    |
| African American                             | 95.8% (n=23)       | 100% (n=40)           | 1.69                       | .20                |
| White/Biracial/Latino/Asian                  | 4.2% (n=1)         | 0% (n=0)              |                            |                    |
| <b><u>Employment</u></b>                     |                    |                       |                            |                    |
| Unemployed                                   | 83.3% (n=20)       | 87.5% (n=35)          | .215                       | .64                |
| Employed                                     | 16.7% (n=4)        | 12.5% (n=5)           |                            |                    |
| <b><u>Total Household Monthly Income</u></b> |                    |                       |                            |                    |
| <\$1000                                      | 82.6% (n=19)       | 83.8% (n=31)          | .01                        | .91                |
| ≥ \$1000                                     | 17.4% (n=4)        | 16.2% (n=6)           |                            |                    |
| <b><u>Current Substance Abuse</u></b>        |                    |                       |                            |                    |
| No                                           | 83.3% (n=20)       | 97.5% (n=39)          | 4.18                       | .04                |
| Yes                                          | 16.7% (n=4)        | 2.5% (n=1)            |                            |                    |
| <b><u>Lifetime Suicide Attempt</u></b>       |                    |                       |                            |                    |
| No                                           | 69.6% (n=16)       | 87.5% (n=35)          | 3.05                       | .08                |
| Yes                                          | 30.4% (n=7)        | 12.5% (n=5)           |                            |                    |
| <b>Replication PACAP Blood Sample</b>        |                    |                       |                            |                    |
| <b><u>Sex</u></b>                            |                    |                       |                            |                    |
| Female                                       | 100% (n=30)        | 100% (n=45)           |                            |                    |
| Male                                         | 0% (n=0)           | 0% (n=0)              |                            |                    |
| <b><u>Race/Ethnicity</u></b>                 |                    |                       |                            |                    |
| African American                             | 96.7% (n=29)       | 93.3% (n=42)          | 3.96                       | .52                |
| White/Biracial/Latino/Asian                  | 3.3% (n=1)         | 6.7% (n=3)            |                            |                    |
| <b><u>Employment</u></b>                     |                    |                       |                            |                    |
| Unemployed                                   | 73.3% (n=22)       | 66.7% (n=30)          | .376                       | .54                |
| Employed                                     | 26.7% (n=8)        | 33.3% (n=15)          |                            |                    |
| <b><u>Total Household Monthly Income</u></b> |                    |                       |                            |                    |
| <\$1000                                      | 65.5% (n=19)       | 69.8% (n=30)          | .14                        | .70                |
| ≥ \$1000                                     | 34.5% (n=10)       | 30.2% (n=13)          |                            |                    |
| <b><u>Current Substance Abuse</u></b>        |                    |                       |                            |                    |
| No                                           | 96.7% (n=29)       | 100% (n=45)           | 1.52                       | .22                |
| Yes                                          | 3.3% (n=1)         | 0% (n=0)              |                            |                    |
| <b><u>Lifetime Suicide Attempt</u></b>       |                    |                       |                            |                    |
| No                                           | 62.1% (n=18)       | 74.4% (n=32)          | 1.25                       | .27                |
| Yes                                          | 37.9% (n=11)       | 25.6% (n=11)          |                            |                    |

*Note that totals for each column are not always equal due to occasional subjects with missing data.*

**TABLE 2 Demographics in the two Genetics study samples**

| <b>Initial Genetics Sample</b>        |               |                |                            |             |
|---------------------------------------|---------------|----------------|----------------------------|-------------|
|                                       | <b>PTSD</b>   | <b>No PTSD</b> | <b><math>\chi^2</math></b> | <b>Sig.</b> |
| <b>Sex</b>                            |               |                |                            |             |
| Female                                | 64.7% (n=165) | 62.2% (n=338)  | .45                        | .50         |
| Male                                  | 35.3% (n=90)  | 37.8% (n=205)  |                            |             |
| <b>Race/Ethnicity</b>                 |               |                |                            |             |
| African American                      | 92.5% (n=235) | 92.2% (n=498)  | .02                        | .88         |
| White/Bi-racial/Latino/Asian          | 7.5% (n=19)   | 7.8% (n=42)    |                            |             |
| <b>Employment</b>                     |               |                |                            |             |
| Unemployed                            | 77.6% (n=198) | 72.4% (n=391)  | 2.47                       | .12         |
| Employed                              | 22.4% (n=57)  | 27.6% (n=149)  |                            |             |
| <b>Total Household Monthly Income</b> |               |                |                            |             |
| <\$1000                               | 73.6% (n=184) | 69.5% (n=365)  | 1.36                       | .24         |
| ≥ \$1000                              | 26.4% (n=66)  | 30.5% (n=160)  |                            |             |
| <b>Current Substance Abuse</b>        |               |                |                            |             |
| Yes                                   | 87.7% (n=222) | 96.8% (n=515)  | 24.5                       | <.001       |
| No                                    | 12.3% (n=31)  | 3.2% (n=17)    |                            |             |
| <b>Lifetime Suicide Attempt</b>       |               |                |                            |             |
| No                                    | 69.8% (n=171) | 88.9% (n=466)  | 42.9                       | <.001       |
| Yes                                   | 30.2% (n=74)  | 11.1% (n=58)   |                            |             |
| <b>Replication Genetics Sample</b>    |               |                |                            |             |
| <b>Sex</b>                            |               |                |                            |             |
| Female                                | 60.8% (n=87)  | 58.4% (n=173)  | .23                        | .63         |
| Male                                  | 39.2% (n=56)  | 41.6% (n=123)  |                            |             |
| <b>Race/Ethnicity</b>                 |               |                |                            |             |
| African American                      | 93.7% (n=134) | 91.8% (n=270)  | .48                        | .49         |
| White/Bi-racial/Latino/Asian          | 6.3% (n=9)    | 8.2% (n=24)    |                            |             |
| <b>Employment</b>                     |               |                |                            |             |
| Unemployed                            | 72.0% (n=103) | 61.6% (n=181)  | 4.63                       | .03         |
| Employed                              | 28.0% (n=40)  | 38.4% (n=113)  |                            |             |
| <b>Total Household Monthly Income</b> |               |                |                            |             |
| <\$1000                               | 67.9% (n=91)  | 60.4% (n=172)  | 2.23                       | .14         |
| ≥ \$1000                              | 32.1% (n=43)  | 39.6% (n=113)  |                            |             |
| <b>Current Substance Abuse</b>        |               |                |                            |             |
| No                                    | 95.0% (n=132) | 96.9% (n=278)  | .94                        | .33         |
| Yes                                   | 5.0% (n=7)    | 3.1% (n=9)     |                            |             |
| <b>Lifetime Suicide Attempt</b>       |               |                |                            |             |
| No                                    | 78.7% (n=111) | 88.6% (n=257)  | 7.45                       | .01         |
| Yes                                   | 21.3% (n=30)  | 11.4% (n=33)   |                            |             |

*Note that totals for each column are not always equal due to occasional subjects with missing data*

**TABLE 3 Demographics in the 4 study samples**

| <b>Initial PACAP Blood Sample</b>     |                    |          |             |          |             |
|---------------------------------------|--------------------|----------|-------------|----------|-------------|
| <b>Variable</b>                       | <b>PTSD status</b> | <b>N</b> | <b>Mean</b> | <b>F</b> | <b>Sig.</b> |
| <b>Age</b>                            | No PTSD            | 40       | 41.52       | 1.68     | .20         |
|                                       | PTSD               | 24       | 45.79       |          |             |
| <b>BDI</b>                            | No PTSD            | 39       | 7.72        | 56.9     | <.001       |
|                                       | PTSD               | 24       | 26.4        |          |             |
| <b>CTQ</b>                            | No PTSD            | 39       | 39.35       | 6.87     | .011        |
|                                       | PTSD               | 24       | 50.94       |          |             |
| <b>TEI</b>                            | No PTSD            | 40       | 2.39        | 9.99     | .002        |
|                                       | PTSD               | 23       | 4.05        |          |             |
| <b>PSS</b>                            | No PTSD            | 40       | 4.3         | 145.57   | <.001       |
|                                       | PTSD               | 24       | 29.25       |          |             |
| <b>Replication PACAP Blood Sample</b> |                    |          |             |          |             |
| <b>Age</b>                            | No PTSD            | 45       | 30.44       | 3.33     | .07         |
|                                       | PTSD               | 30       | 34.97       |          |             |
| <b>BDI</b>                            | No PTSD            | 45       | 12.93       | 38.57    | <.001       |
|                                       | PTSD               | 29       | 28.37       |          |             |
| <b>CTQ</b>                            | No PTSD            | 45       | 42.72       | 7.09     | .01         |
|                                       | PTSD               | 30       | 56.25       |          |             |
| <b>TEI</b>                            | No PTSD            | 45       | 2.55        | 1.48     | .23         |
|                                       | PTSD               | 30       | 3.16        |          |             |
| <b>PSS</b>                            | No PTSD            | 45       | 7.65        | 116.84   | <.001       |
|                                       | PTSD               | 30       | 29.24       |          |             |
| <b>Initial Gene Sample</b>            |                    |          |             |          |             |
| <b>Age</b>                            | No PTSD            | 538      | 39.71       | 5.26     | .02         |
|                                       | PTSD               | 254      | 41.98       |          |             |
| <b>BDI<sup>1</sup></b>                | No PTSD            | 524      | 10.33       | 293.12   | <.001       |
|                                       | PTSD               | 243      | 24.10       |          |             |
| <b>CTQ<sup>2</sup></b>                | No PTSD            | 533      | 38.53       | 72.12    | <.001       |
|                                       | PTSD               | 246      | 49.51       |          |             |
| <b>TEI<sup>3</sup></b>                | No PTSD            | 537      | 2.33        | 60.24    | <.001       |
|                                       | PTSD               | 247      | 3.45        |          |             |
| <b>PSS<sup>4</sup></b>                | No PTSD            | 545      | 6.16        | 1308.9   | <.001       |
|                                       | PTSD               | 256      | 26.87       |          |             |
| <b>Replication Genetics Sample</b>    |                    |          |             |          |             |
| <b>Age</b>                            | No PTSD            | 294      | 38.09       | .024     | .877        |
|                                       | PTSD               | 143      | 38.29       |          |             |
| <b>BDI</b>                            | No PTSD            | 275      | 9.45        | 159.20   | <.001       |
|                                       | PTSD               | 127      | 23.29       |          |             |
| <b>CTQ</b>                            | No PTSD            | 295      | 37.50       | 42.34    | <.001       |
|                                       | PTSD               | 143      | 48.15       |          |             |
| <b>TEI</b>                            | No PTSD            | 292      | 2.14        | 48.28    | <.001       |
|                                       | PTSD               | 141      | 3.43        |          |             |
| <b>PSS</b>                            | No PTSD            | 296      | 6.23        | 582.77   | <.001       |
|                                       | PTSD               | 143      | 26.77       |          |             |

Note that totals for each column are not always equal due to occasional subjects with missing data

<sup>1</sup> BDI = Beck Depression Inventory, <sup>2</sup> CTQ = Childhood Trauma Questionnaire Total Score, <sup>3</sup>

TEI = Total types of non-childhood abuse trauma, <sup>4</sup> PSS=PTSD symptoms

## Supplemental Table 4:

### Location of potential *EREs* within the *ADCYAP1R1* gene

|    | Start pos. | Strand | Matrix sim. | Core sim. | Sequence             | SNP        |
|----|------------|--------|-------------|-----------|----------------------|------------|
| 1  | 31084308   | -      | 0.818       | 0.809     | ctgggacagggcCACccac  | no SNP     |
| 2  | 31085588   | +      | 0.914       | 1         | ctatcacAAGGacagaaaa  | no SNP     |
| 3  | 31085910   | -      | 0.93        | 1         | gtttgCAGGccacagga    | rs78430287 |
| 4  | 31086075   | -      | 0.813       | 1         | tacaGTCAaagtgagccag  | no SNP     |
| 5  | 31086111   | -      | 0.883       | 1         | atggGTCAgagtctctgc   | no SNP     |
| 6  | 31088143   | -      | 0.936       | 1         | gccctagaAGGTcaagtgc  | no SNP     |
| 7  | 31088391   | -      | 0.872       | 1         | tgggGTCAgatggccagag  | no SNP     |
| 8  | 31089400   | +      | 0.974       | 1         | ggcttacaAGGTcagagct  | no SNP     |
| 9  | 31089695   | -      | 0.935       | 1         | ctagcccAAGGacacacag  | no SNP     |
| 10 | 31090164   | -      | 0.992       | 1         | gaagatcaAGGTcatctat  | no SNP     |
| 11 | 31090794   | +      | 0.837       | 0.779     | cctggacaaggtGGCCata  | no SNP     |
| 11 | 31090794   | -      | 0.818       | 0.794     | tatggccaccttGTCcagg  | no SNP     |
| 12 | 31091057   | -      | 0.85        | 0.806     | acagGTAaaggtggcctag  | no SNP     |
| 12 | 31091057   | +      | 0.846       | 0.779     | ctaggccacctTACCgtt   | no SNP     |
| 13 | 31092118   | +      | 0.852       | 1         | cagggacacacgGACCCcg  | no SNP     |
| 14 | 31093439   | +      | 0.873       | 0.781     | ggagGCCAacttgccctgg  | no SNP     |
| 14 | 31093439   | -      | 0.884       | 0.781     | ccagGCCAagttgccctcc  | no SNP     |
| 15 | 31093485   | +      | 0.952       | 1         | catcctgaAGGTcaagcta  | no SNP     |
| 16 | 31093678   | -      | 0.983       | 1         | cctcccaAGGTcagtgag   | no SNP     |
| 17 | 31094278   | -      | 0.877       | 1         | ccagccccAGGTcaatgaa  | no SNP     |
| 18 | 31094433   | +      | 0.831       | 0.774     | ggagGTGAaatgagtttc   | no SNP     |
| 19 | 31095813   | -      | 0.983       | 1         | ggagggcaAGGTcataaag  | no SNP     |
| 20 | 31095819   | +      | 0.87        | 1         | caagGTCAtaaagggcggg  | no SNP     |
| 21 | 31095878   | -      | 0.882       | 1         | atcctccAAGGccaactca  | no SNP     |
| 22 | 31096906   | +      | 0.887       | 0.778     | actcctcCAGGtcaggaga  | no SNP     |
| 23 | 31096978   | -      | 0.904       | 1         | caagGTCAtgctgagagt   | no SNP     |
| 24 | 31096984   | -      | 0.986       | 1         | cttcccaAGGTcatgctg   | no SNP     |
| 25 | 31098160   | -      | 0.983       | 1         | actttccaAGGTcacacaa  | no SNP     |
| 26 | 31101000   | +      | 0.875       | 1         | ccagtgtAGGTcaagcca   | no SNP     |
| 27 | 31101407   | +      | 0.827       | 1         | gagggacacaaaGACCctt  | no SNP     |
| 28 | 31102744   | -      | 0.838       | 0.809     | cggggcaagacCACctcc   | no SNP     |
| 29 | 31103256   | -      | 0.853       | 0.791     | gcagGGCAAttgtggctgg  | no SNP     |
| 30 | 31103402   | +      | 0.843       | 0.794     | gtgggtgagctGTCCtca   | no SNP     |
| 30 | 31103402   | -      | 0.843       | 0.809     | tgaggacagctCACccac   | no SNP     |
| 31 | 31104740   | -      | 0.837       | 1         | gtgaggcatccaGACCaca  | no SNP     |
| 32 | 31106735   | +      | 0.914       | 1         | ggagGTCAgggtgtgaaag  | no SNP     |
| 33 | 31108105   | +      | 0.93        | 1         | agggtgaaAGGTcatacag  | no SNP     |
| 34 | 31108438   | -      | 0.974       | 1         | tgacagcaAGGTcaatgct  | no SNP     |
| 35 | 31108993   | +      | 0.94        | 1         | ctggccaaAGGTcagctga  | no SNP     |
| 36 | 31109007   | -      | 0.928       | 1         | gtgtttcAAGGacatcagc  | no SNP     |
| 37 | 31111801   | +      | 0.859       | 0.767     | atagGCCAgtgtgatcagc  | no SNP     |
| 38 | 31114138   | -      | 0.913       | 1         | cgagGTCAcagggccacct  | no SNP     |
| 39 | 31114144   | -      | 0.877       | 1         | cactgcccAGGTcacaggg  | RS57410846 |
| 40 | 31114269   | +      | 0.888       | 1         | cagGTCAacatgggctgc   | no SNP     |
| 41 | 31114313   | +      | 0.933       | 1         | ctctttcAAGGacatgatg  | no SNP     |
| 42 | 31114319   | -      | 0.83        | 0.794     | ctgtgacatcatGTCCttg  | no SNP     |
| 43 | 31115668   | -      | 0.821       | 0.809     | gctggacaccccCACcttg  | no SNP     |
| 44 | 31115903   | -      | 0.985       | 1         | tctaccaAGGTcaccagc   | no SNP     |
| 45 | 31117734   | +      | 0.882       | 0.772     | ttagGCCAcgctggcctag  | no SNP     |
| 46 | 31117734   | -      | 0.884       | 0.772     | ctagGCCAagcgtggcctaa | no SNP     |
| 47 | 31117779   | +      | 0.914       | 1         | aagcaccAAGGacagggag  | no SNP     |
| 48 | 31119037   | -      | 0.908       | 1         | ccagGTCAcatggccacac  | no SNP     |
| 49 | 31119043   | -      | 0.875       | 1         | ctaagcccAGGTcacatgg  | no SNP     |
| 50 | 31120724   | +      | 0.826       | 1         | gcatgtcagctgGACCttg  | no SNP     |
| 51 | 31121902   | +      | 0.837       | 1         | agtaggcacaatGACCgcg  | no SNP     |
| 52 | 31121902   | -      | 0.901       | 1         | cgcgGTCAAttgtgcctact | no SNP     |
| 53 | 31122642   | -      | 0.905       | 1         | tgtggccAAGGccacctcc  | no SNP     |
| 54 | 31125315   | +      | 0.941       | 1         | gaagaggaAGGTcaggtgg  | no SNP     |
| 55 | 31126976   | +      | 0.845       | 0.774     | actgGTGAactgactttt   | no SNP     |
| 56 | 31127311   | -      | 0.93        | 1         | tcatcccAAGGacactcac  | no SNP     |
| 57 | 31131686   | +      | 0.857       | 1         | tctGTCAAttgtgccttgt  | no SNP     |
| 58 | 31132443   | -      | 0.872       | 1         | ctgatgctAGGTcacccta  | no SNP     |
| 59 | 31132860   | +      | 0.811       | 0.779     | tcggggcagctcTACCtct  | no SNP     |
| 60 | 31133995   | -      | 0.894       | 1         | cagacacAAGGgcagtgctc | no SNP     |
| 61 | 31134660   | -      | 0.857       | 1         | cagggctccttGACCctg   | no SNP     |
| 61 | 31134660   | +      | 0.915       | 1         | caggGTCAaggagacctg   | no SNP     |
| 62 | 31135494   | -      | 0.877       | 1         | tcagGTCAaggagacctg   | rs2267735  |
| 63 | 31135669   | +      | 0.876       | 1         | gtagGTCAgggttaactgg  | no SNP     |
| 64 | 31135884   | -      | 0.874       | 1         | tggggccaaggaGACCcca  | no SNP     |
| 65 | 31136983   | -      | 0.869       | 1         | agatGTCAaatgtcttaa   | no SNP     |
| 66 | 31139247   | -      | 0.891       | 1         | gaagGTCAacttgggtgtc  | no SNP     |
| 67 | 31139253   | -      | 0.952       | 1         | ggctgtgaAGGTcaacttg  | no SNP     |
| 68 | 31140809   | -      | 0.886       | 1         | acagtccAAGGgcaacacc  | no SNP     |
| 69 | 31142030   | -      | 0.839       | 1         | ctaggacacctgGACCatg  | no SNP     |
| 70 | 31143664   | -      | 0.942       | 1         | ggTggagaAGGTcaagtca  | no SNP     |
| 71 | 31143686   | +      | 0.888       | 1         | ttaatccAAGGccatttaa  | no SNP     |
| 72 | 31143723   | -      | 0.828       | 0.809     | catagtcagtctCACcaga  | no SNP     |
| 73 | 31144368   | +      | 0.88        | 1         | ccccatccAGGTcatggtg  | no SNP     |
| 74 | 31144374   | +      | 0.914       | 1         | ccagGTCAtggtgtatttc  | no SNP     |
| 75 | 31147441   | -      | 0.917       | 1         | caaggtcAAGGgcataaaa  | no SNP     |
| 76 | 31147447   | -      | 0.994       | 1         | gtgagtcaAGGTcaagggc  | no SNP     |
| 77 | 31147886   | -      | 0.933       | 1         | actggccAAGGacacagag  | no SNP     |

# Supplemental Figure 1: ADCYAP1R1 Tag SNP location and LD Plot

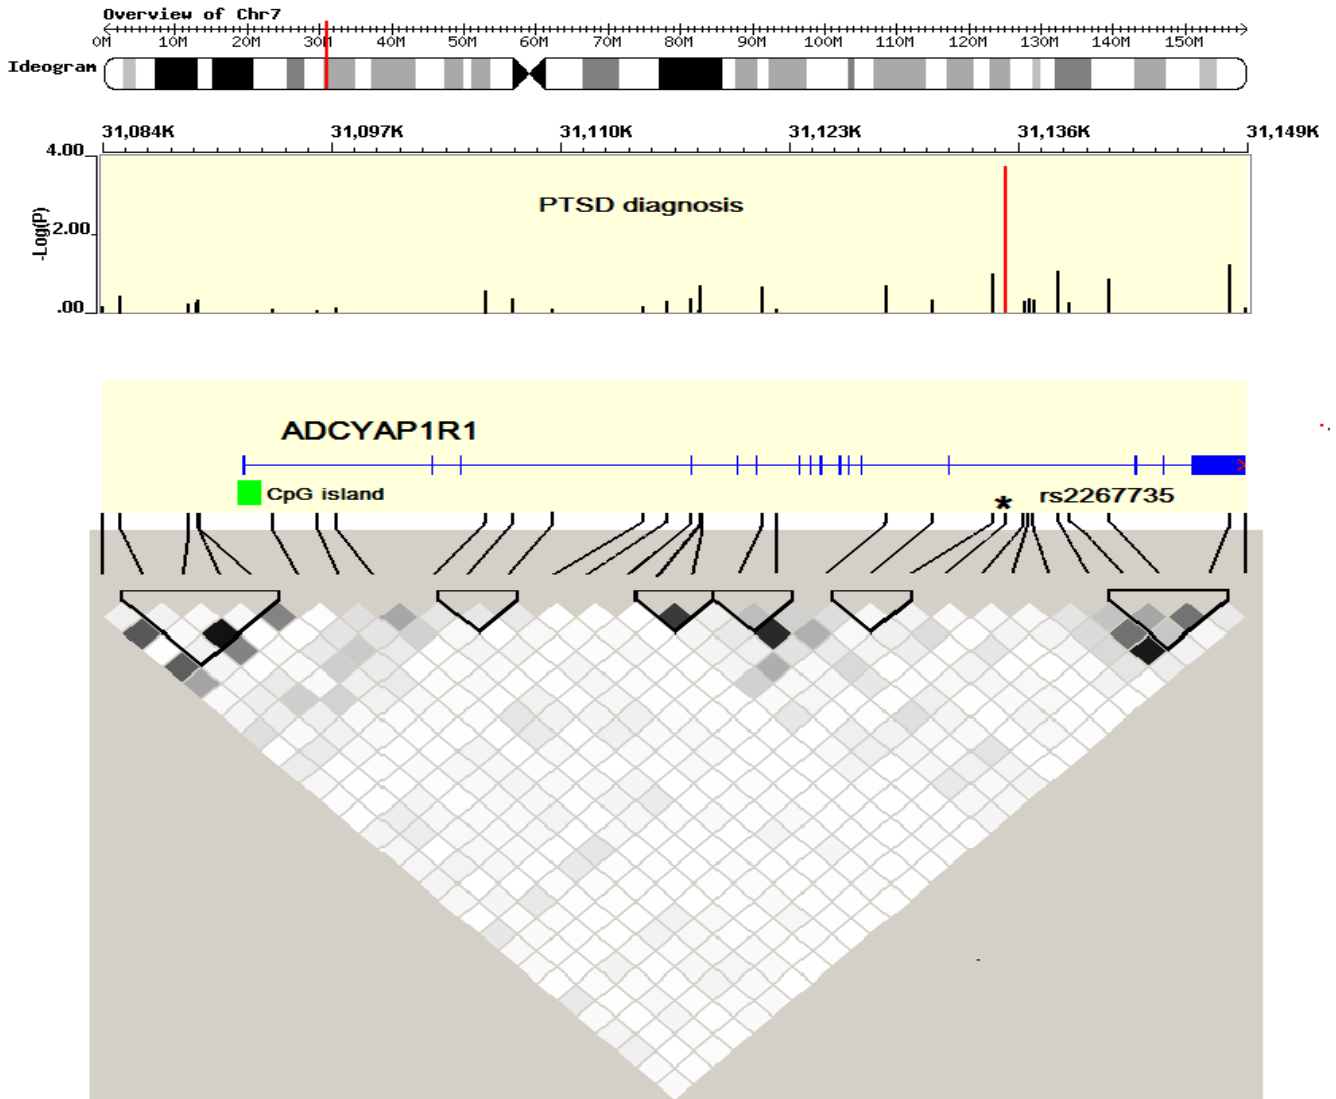

## Supplemental Figure 2 – ADCYAP1 Tag SNP

### *ADCYAP1 (PACAP Peptide) TagSNP*

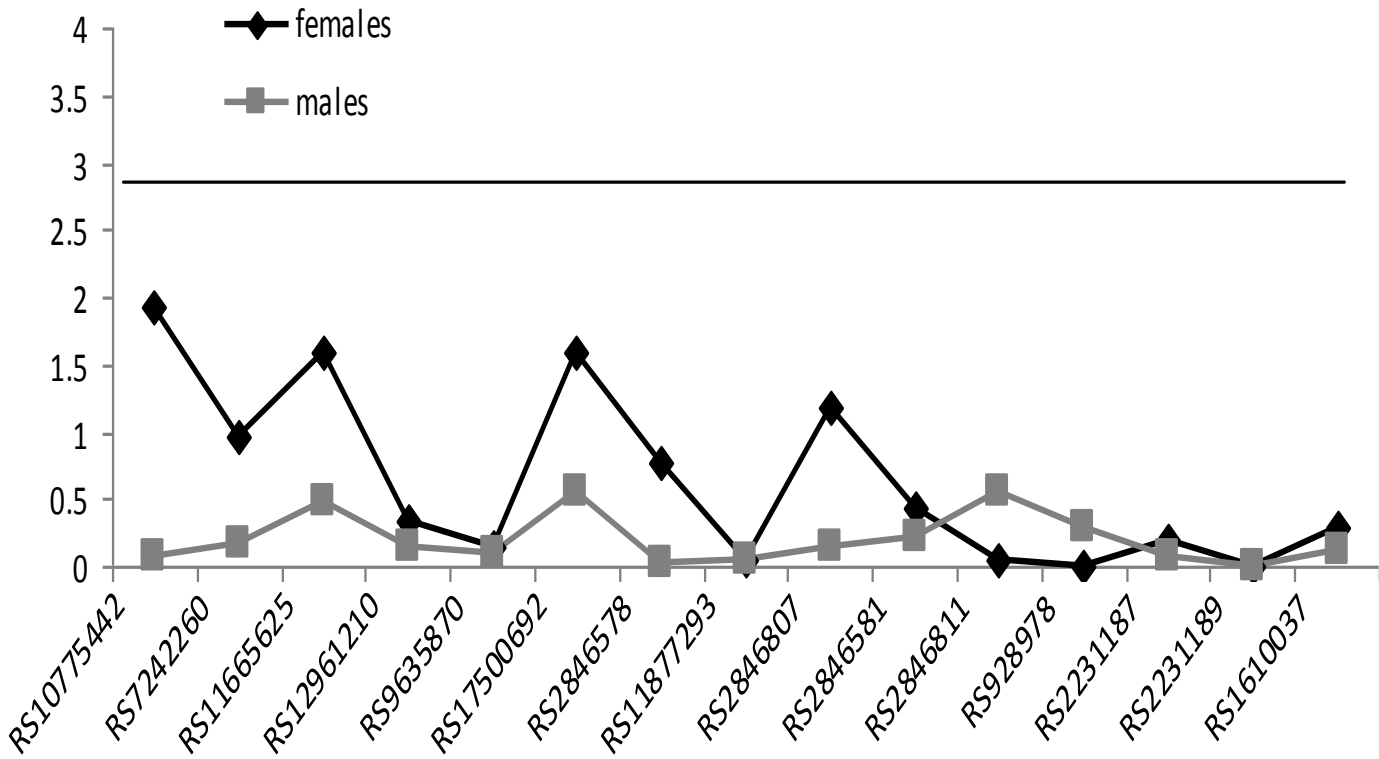

**Supplemental Figure 3:**  
**rs2267735 and Depression and Substance Abuse**

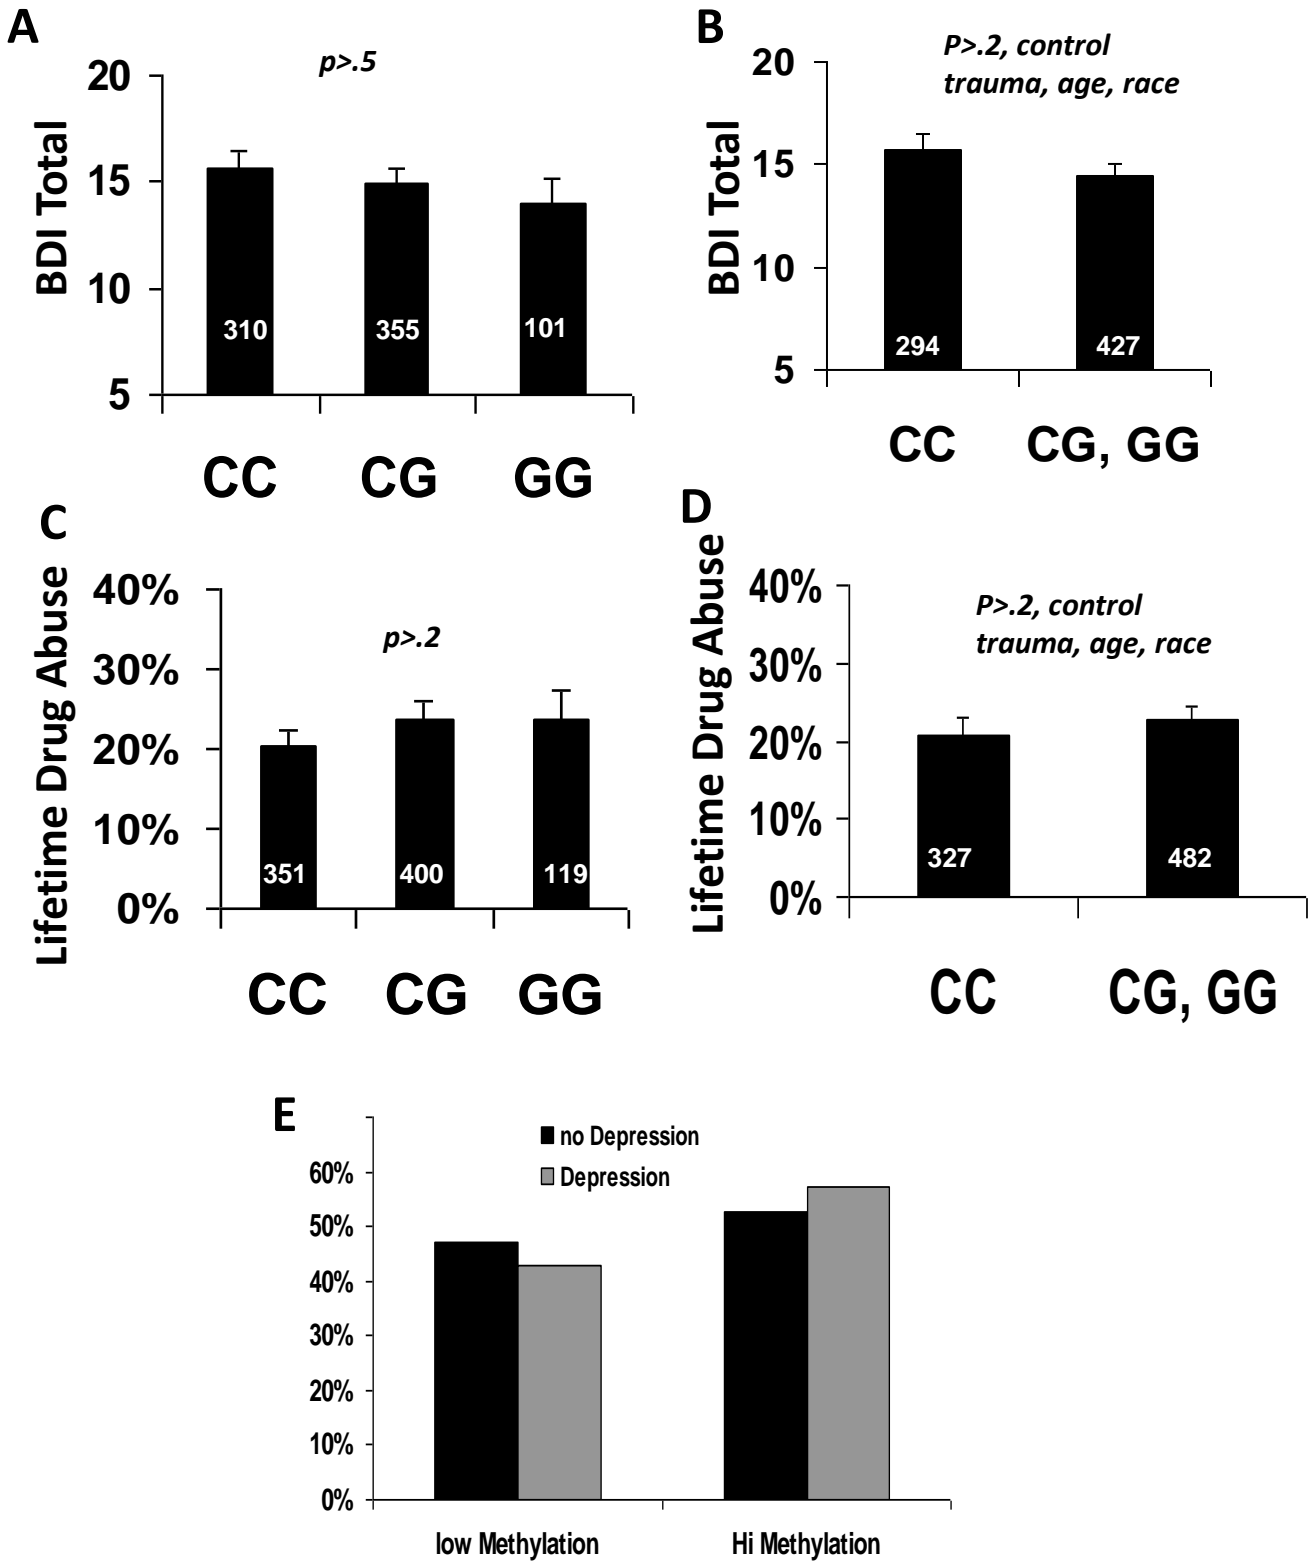

Supplement: NIHMS262927-supplement-2.pdf [file NIHMS262927-supplement-2.pdf]
